# Supplementary material
Source: PubMed Central journal article supplement (PMC8646700)

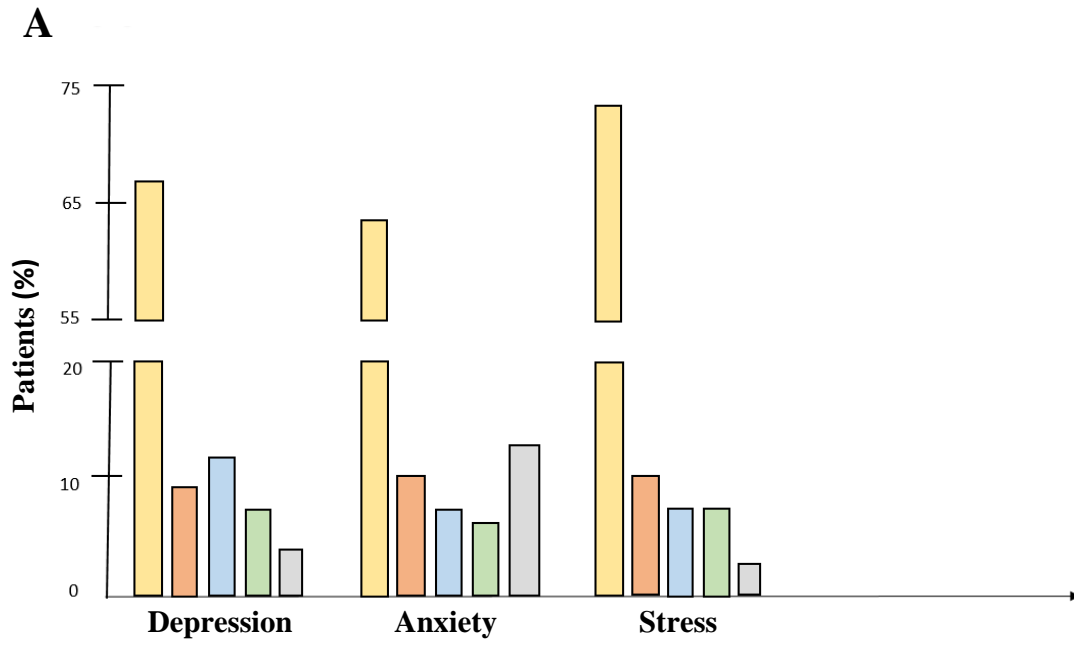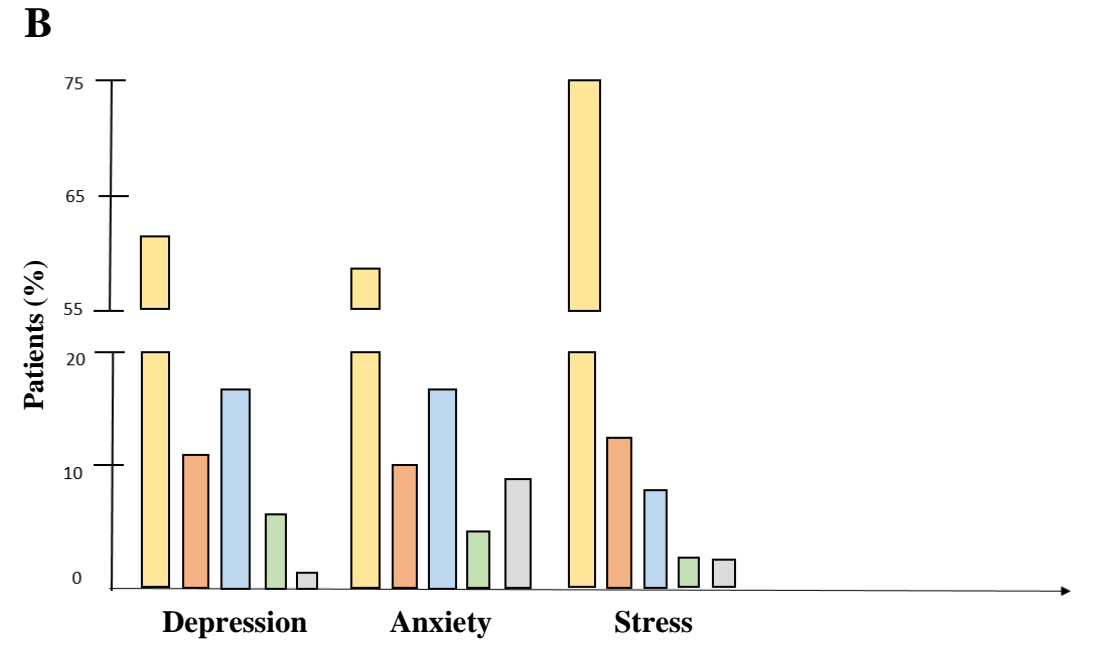

Supplementary Figure 1

Supplement: JNE-33-e13041-s002.pdf [file JNE-33-e13041-s002.pdf]
